# Supplementary material for: The gastric caecum of larvalAedes aegypti: stimulation of epithelial ion transport by 5-hydroxytryptamine and cAMP
Source: Oxford University Press journal article supplement (doi:10.1242/jeb.172866), 2017-01-01
Supplement: jeb172866supp.pdf [file jeb172866supp.pdf]

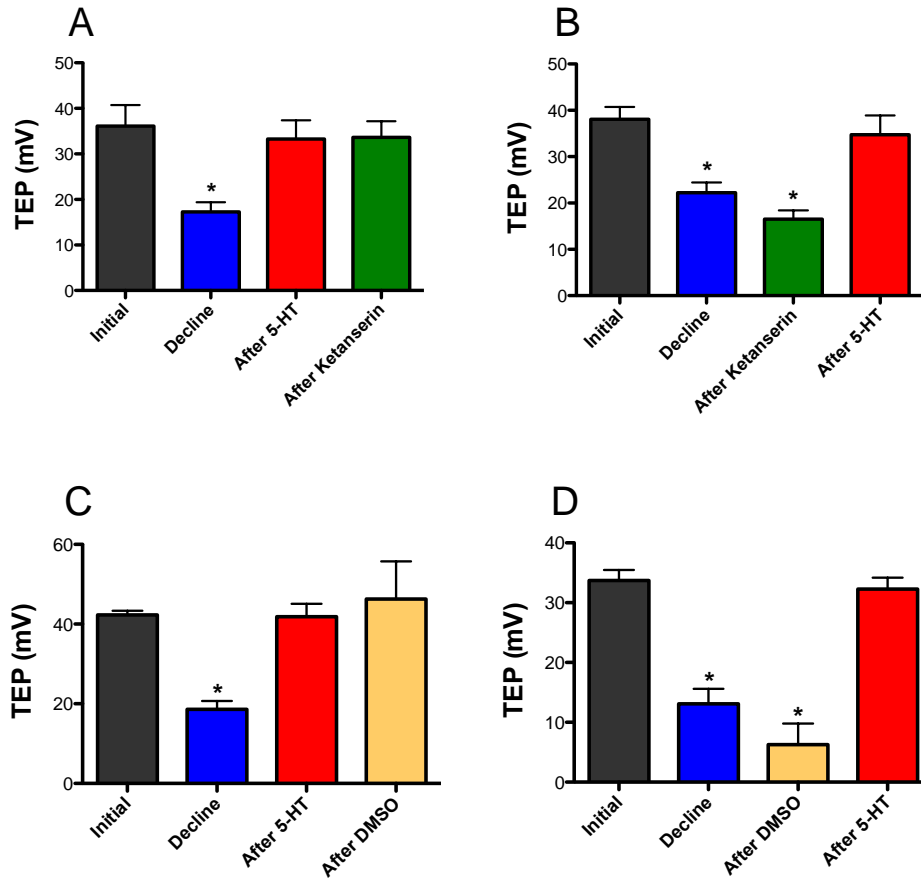

Figure S1: Transepithelial potential (TEP) of the gastric caecum of fourth instar *Aedes aegypti* larvae reared in freshwater. An initial TEP was measured, followed after 10 mins by a measurement during the decline in TEP. TEP was then measured (A) after the addition of 5-HT followed by ketanserin, (B) after the addition of ketanserin followed by 5-HT, (C) after the addition of 5-HT followed by DMSO (dimethyl sulfoxide; carrier for ketanserin), (D) after the addition of DMSO followed by 5-HT. Data are expressed as mean  $\pm$  sem (N= 4-8). Asterisks denote significant difference between treatments; significance ( $p < 0.05$ ) was determined by one-way ANOVA followed by Tukey's post-hoc test.
